# Supplementary material for: Epidemiological correlates of overweight and obesity in the Northern Cape Province, South Africa
Source: PeerJ. 2023 Feb 9;11:e14723. doi: 10.7717/peerj.14723 (PMC9922494; doi:10.7717/peerj.14723)
Supplement: Supplemental Information 3 — Some categorical variables are coded 0, 1, or 2. This file contains what those numbers mean for each variable. [file peerj-11-14723-s003.xlsx]

## Sheet: Sheet1
Variable	0	1	2
Sex	NA	Female	Male
Smokes	No	Yes	NA
Diabetes	No	Yes	NA
Drinks Alcohol	No	Yes	NA
